# Supplementary material
Source: MDPI journal article supplement (https://www.mdpi.com/2073-4441/15/6/1118)
Supplement: s1 [file s1]

**Table S1.** Calculated piezometric heads of scenario no. 1 with reference to the calculated piezometric heads in the groundwater baseline.

| Obs. Well no.                       | Calculated piezometric heads in the groundwater baseline (masl) | Calculated piezometric heads in the first Scenario (masl) | Drawdown (m) |
|-------------------------------------|-----------------------------------------------------------------|-----------------------------------------------------------|--------------|
| 1                                   | 5.8                                                             | 5.66                                                      | 0.14         |
| 2                                   | 14.6                                                            | 14.15                                                     | 0.45         |
| 3                                   | 9.02                                                            | 8.39                                                      | 0.61         |
| 4                                   | 20.8                                                            | 20.46                                                     | 0.34         |
| 5                                   | 25.4                                                            | 24.92                                                     | 0.48         |
| 6                                   | 10.6                                                            | 9.97                                                      | 0.63         |
| Average drawdown for Scenario no. 1 |                                                                 |                                                           | 0.44         |

**Table S2.** Calculated piezometric heads of Scenario no. 2 with reference to the calculated heads in the baseline.

| Obs. Well no.                       | Calculated head in baseline (masl) | Calculated head in Scenario 2 (masl) | Drawdown (m) |
|-------------------------------------|------------------------------------|--------------------------------------|--------------|
| 1                                   | 5.8                                | 3.1                                  | 2.7          |
| 2                                   | 14.69                              | 6.87                                 | 7.82         |
| 3                                   | 9.02                               | 2.08                                 | 6.94         |
| 4                                   | 20.8                               | 13.99                                | 6.81         |
| 5                                   | 25.46                              | 16.96                                | 8.5          |
| 6                                   | 10.68                              | 1.63                                 | 9.05         |
| Average drawdown for scenario no. 2 |                                    |                                      | 6.97         |

**Table S3.** Calculated piezometric heads of Scenario no. 3 with reference to calculated heads of baseline.

| Obs. Well no.                                      | Calculated piezometric head in baseline (masl) | Calculated piezometric head in Scenario no. 3 (masl) | Water level increase (m) |
|----------------------------------------------------|------------------------------------------------|------------------------------------------------------|--------------------------|
| 1                                                  | 5.80                                           | 5.90                                                 | 0.10                     |
| 2                                                  | 14.69                                          | 14.81                                                | 0.12                     |
| 3                                                  | 9.02                                           | 9.10                                                 | 0.08                     |
| 4                                                  | 20.80                                          | 20.97                                                | 0.17                     |
| 5                                                  | 25.46                                          | 25.65                                                | 0.19                     |
| 6                                                  | 10.68                                          | 10.80                                                | 0.12                     |
| Average increase in water level for Scenario no. 3 |                                                |                                                      | 0.13                     |

**Table S4.** Calculated piezometric heads of Scenario no. 4 with reference to the calculated heads of baseline.

| Obs. Well no.                      | Calculated piezometric heads in baseline (masl) | Calculated piezometric heads in Scenario no. 4 (masl) | Drawdown (m) |
|------------------------------------|-------------------------------------------------|-------------------------------------------------------|--------------|
| 1                                  | 5.8                                             | 5.7                                                   | 0.1          |
| 2                                  | 14.69                                           | 14.26                                                 | 0.43         |
| 3                                  | 9.02                                            | 8.44                                                  | 0.58         |
| 4                                  | 20.8                                            | 20.6                                                  | 0.2          |
| 5                                  | 25.46                                           | 25.1                                                  | 0.36         |
| 6                                  | 10.68                                           | 10.1                                                  | 0.58         |
| Average drawdown in Scenario no. 4 |                                                 |                                                       | 0.37         |

**Table S5.** Calculated piezometric heads of scenario no. 5 with reference to calculated heads of the baseline.

| <b>Obs.<br/>Well<br/>no.</b>        | <b>Calculated piezometric<br/>heads in baseline (masl)</b> | <b>Calculated piezometric<br/>heads in Scenario 5<br/>(masl)</b> | <b>Drawdown<br/>(m)</b> |
|-------------------------------------|------------------------------------------------------------|------------------------------------------------------------------|-------------------------|
| 1                                   | 5.8                                                        | 3.22                                                             | 2.58                    |
| 2                                   | 14.69                                                      | 7.01                                                             | 7.68                    |
| 3                                   | 9.02                                                       | 2.17                                                             | 6.85                    |
| 4                                   | 20.8                                                       | 14.1                                                             | 6.7                     |
| 5                                   | 25.46                                                      | 17.1                                                             | 8.36                    |
| 6                                   | 10.68                                                      | 1.75                                                             | 8.93                    |
| Average drawdown for Scenario no. 5 |                                                            |                                                                  | 6.85                    |
